# Supplementary material
Source: publisher site journal article supplement (https://www.dovepress.com/article/593604)
Supplement: Supplementary file 1 [file 593604%20Revised%20Supplementary%20material.docx]

**Table S1.** **Missing data distribution and handling strategies by variable**

| Study variables | Number of cases with missing data | Missing rate (%) | Handling strategy |
| --- | --- | --- | --- |
| Demographic characteristics |  |  |  |
| Age (years) | 0 | 0 | - |
| BMI (kg/m²) | 8 | 1.2 | Complete-case analysis |
| Primary gynecological diagnosis | 0 | 0 | - |
| Comorbidities (hypertension/diabetes) | 5 | 0.8 | Complete-case analysis |
| Pre-transport condition assessment |  |  |  |
| MEWS score | 6 | 0.9 | Complete-case analysis |
| GCS score | 4 | 0.6 | Complete-case analysis |
| SOFA score | 7 | 1.1 | Complete-case analysis |
| Use of vasoactive drugs | 0 | 0 | - |
| Mechanical ventilation | 0 | 0 | - |
| Transport process parameters |  |  |  |
| Transport duration (minutes) | 9 | 1.4 | Complete-case analysis |
| ICU staff as company | 0 | 0 | - |
| Outcome variable |  |  |  |
| Adverse event occurrence | 0 | 0 | - |

**Table S2. TRIPOD Checklist for Development and evaluation of a risk prediction model for intrahospital transport adverse events in critically ill gynecological patients**

Article type： Development and internal validation of a multivariable prediction model

Study design： Retrospective observational cohort study

Date completed： 2025-06-30

Filler: Tifang Qin, Qian Zhou, Jian Zhou

Supervisor's Review: Jian Zhou

Affiliated Institution: Jiangsu Province Academy of Traditional Chinese Medicine

| TRIPOD Item | Item Content | Corresponding Reporting Location in the Manuscript | Completion Status |
| --- | --- | --- | --- |
| Title and Abstract | 1. Clearly identify the study as a prediction model development/validation study | The title directly reflects model development and evaluation; the abstract elaborates on the model construction, validation methods and clinical application value | ☑ |
| Introduction | 2. Specify the research question: intended use of the model, predictors and outcome indicators | The introduction addresses the clinical need for predicting intrahospital transport adverse events in critically ill gynecological patients, and defines the predictors (SOFA, MEWS, etc.) and primary outcome indicator (transport adverse events) | ☑ |
|  | 3. Describe the target population of the prediction model | Introduction, Section 2.2; the target population is defined as critically ill gynecological patients aged ≥18 years who require intrahospital interdepartmental transport | ☑ |
| Methods | - Study Design - | - | - |
|  | 4. Specify the study design type (development/validation/development + validation) | Section 2.1; a retrospective observational cohort study was conducted for model development and internal validation | ☑ |
|  | 5. Specify the study setting, recruitment time of study participants and data source | Section 2.1; a single-center study with data extracted from the hospital electronic medical record system and transport record system; study period: February 2019 to June 2025 | ☑ |
|  | - Study Participants - | - | - |
|  | 6. Clearly define the inclusion and exclusion criteria for study participants | Section 2.2.1; clear inclusion and exclusion criteria are defined, strictly adhering to the definition of critical illness (APACHE Ⅱ≥10/MEWS≥4) | ☑ |
|  | 7. Explain the basis for sample size calculation (including events per variable ratio) | Section 2.2.2; calculated based on a minimum of 10 outcome events per variable, with 15 candidate variables requiring ≥150 adverse events; combined with an estimated 25% incidence of adverse events, the minimum sample size was 600 patients, and a total of 650 patients were finally enrolled | ☑ |
|  | 8. Describe the grouping method (training/validation set) for study participants, as well as the grouping ratio and method | Section 2.2.2; patients were randomly divided into a model training set (n=455) and an internal validation set (n=195) at a ratio of 7:3, with no stratified randomization applied | ☑ |
|  | - Outcome Indicators - | - | - |
|  | 9. Clearly define the predicted outcome (including measurement methods and time window), and explain the handling of multiple events | Section 2.3; the primary outcome is defined as intrahospital transport adverse events with an operational definition (4 categories of events with quantitative judgment criteria) and the time window from the patient's departure from the ward to return to the ward; multiple events were counted as a single occurrence in the primary analysis, and all event types were documented for subgroup analysis (Table 3) | ☑ |
|  | 10. Explain the assessment method of outcome indicators, adjudicators and application of blinding | Section 2.3; outcome data were extracted from transport logs, nursing handover records and adverse event reporting system; independently adjudicated by 2 blinded researchers, with discrepancies resolved by a third researcher | ☑ |
|  | - Predictors - | - | - |
|  | 11. Fully list all candidate predictors and clarify their definitions and measurement methods | Section 2.3, Table 4; 9 candidate predictors and their definitions are listed; Table 5 and Figure 1 show the 4 final predictors screened by LASSO regression combined with multivariate Logistic regression | ☑ |
|  | 12. Clearly specify the measurement time point of all predictors | Section 2.3; all predictors were collected and assessed within 30 minutes before transport; transport duration was recorded as the actual total process time | ☑ |
|  | 13. Describe in detail the handling method of missing data for predictors | Section 2.3, Table 1; complete-case analysis was adopted for variables with a missing rate <5%, and records were excluded for those with a missing rate ≥10%; no imputation method was used, the distribution of missing data for each variable is reported in Table 1, with an overall missing rate of 1.02% | 🗵 |
|  | - Sample Size - | - | - |
|  | 14. Report the total sample size, sample size of each subgroup/group and the number of outcome events | Section 3.1, Section 3.2; total sample size n=650, training set n=455, validation set n=195; a total of 178 adverse events occurred, including 123 in the training set and 55 in the validation set | ☑ |
|  | - Statistical Analysis - | - | - |
|  | 15. Explain the statistical methods for model development (including variable screening and modeling methods) | Section 2.4, Section 3.3; univariate analysis (screening candidate variables with P<0.10) → LASSO regression (10-fold cross-validation, dimension reduction based on the 1-standard-error criterion) → multivariate Logistic regression (collinearity test with VIF<10) | ☑ |
|  | 16. Explain the model validation methods (discrimination, calibration, clinical utility) | Section 2.4, Section 3.4; discrimination (AUC-ROC curve, Figure 2B); calibration (Hosmer-Lemeshow test, calibration curve, Figure 2C); clinical utility (Decision Curve Analysis, DCA, Figure 2D); Bootstrap resampling (1000 iterations) was used to verify model stability | ☑ |
|  | 17. Explain the model visualization method (e.g., nomogram) | Section 3.4; a nomogram was developed to realize clinical visualization of the model (Figure 2A) | ☑ |
|  | 18. Report the complete model parameters (including intercept, coefficients/OR values of all predictors) | Section 3.4, Table 5; the Logistic regression equation with intercept (-11.986) is presented; Table 5 reports the regression coefficients and OR (95%CI) of each predictor; the risk probability conversion formula is given in Section 3.4 | ☑ |
| Results | - Study Participants - | - | - |
|  | 19. Report the baseline characteristics of the total sample, training set and validation set, and compare the consistency between groups | Section 3.1, Table 2; baseline characteristics of the total sample, training set and validation set are reported, with no significant differences in all indicators between groups (all P>0.05), indicating balanced baselines | ☑ |
|  | - Predictors - | - | - |
|  | 20. Report the distribution characteristics of each predictor and the final predictors screened by the model | Section 3.3, Table 4; the distribution of candidate predictors in the adverse event group/non-adverse event group is reported; Table 5 identifies 4 independent final predictors (mechanical ventilation, SOFA score, MEWS score, transport duration) | ☑ |
|  | - Model Performance - | - | - |
|  | 21. Fully report the model performance indicators of the training set and validation set | Section 3.4; training set: good discrimination and calibration; validation set: AUC=0.852 (95%CI: 0.799-0.904), optimal cut-off value=0.047 (sensitivity=81.8%, specificity=76.4%), non-significant Hosmer-Lemeshow test (P=0.511), DCA showed a net clinical benefit across a threshold probability range of 1%-65% | ☑ |
|  | 22. Report the model parameter estimates (including confidence interval and P value) | Section 3.3, Table 5; reports the regression coefficient (β), standard error (S.E.), Wald χ², OR (95%CI) and P value of each predictor; the regression equation in Section 3.4 includes the intercept term | ☑ |
| Discussion | 23. Interpret the model performance (discrimination/calibration/utility) in combination with clinical context | Discussion section; an AUC of 0.852 is interpreted as excellent discrimination, with good calibration and a wide range of net benefit in DCA, confirming the high clinical applicability of the model | ☑ |
|  | 24. Explain the intended clinical use of the model and analyze the study limitations | Discussion section; the model is clearly intended for risk stratification of transport and formulation of personalized transport plans for critically ill gynecological patients; limitations: single-center study, retrospective design, no external validation, and failure to include potential predictors such as nutritional status | ☑ |
|  | 25. Discuss the generalizability (external validity) of the model and future research directions | Discussion section; points out that the single-center design limits the generalizability of the model; proposes to conduct multi-center external validation and prospective intervention studies in the future to further verify the clinical value of the model | ☑ |
| Others | 26. Indicate the study funding source and competing interests | None (can be supplemented in accordance with journal requirements) | 🗵 |
|  | 27. Provide a data availability statement | None (can be supplemented in accordance with journal requirements) | 🗵 |

Notes

1. This checklist strictly follows the TRIPOD statement for transparent reporting of multivariable prediction models;

2. All page/section/table/figure references are based on the revised manuscript ;

3. The study is a model development + internal validation study; external validation will be conducted in subsequent multi-center research as proposed in the discussion section.
